# Supplementary material
Source: Springer Nature journal article supplement (https://www.springermedizin.de/resource/supplementary/12933_2012_569_MOESM8_ESM.pdf/9538468)

### Lysine Acetylation

**A**Homogenate PelletSupernatant

MW      HG nonHG HG nonHG      HG nonHG HG nonHG

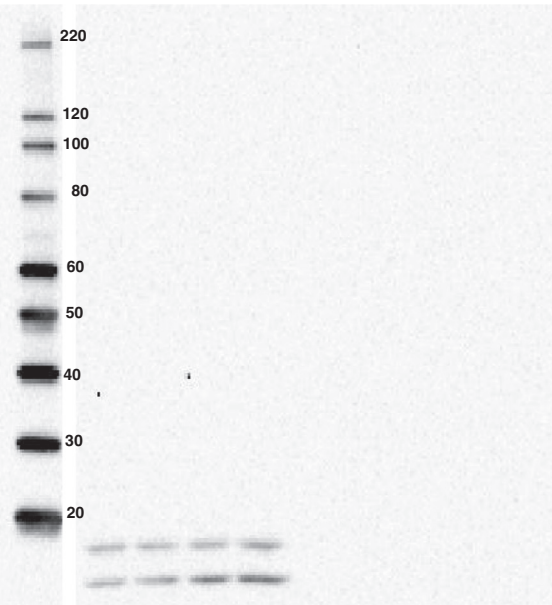

### Pentosidine

**B**Homogenate PelletSupernatant

MW      HG nonHG HG nonHG      HG nonHG HG nonHG

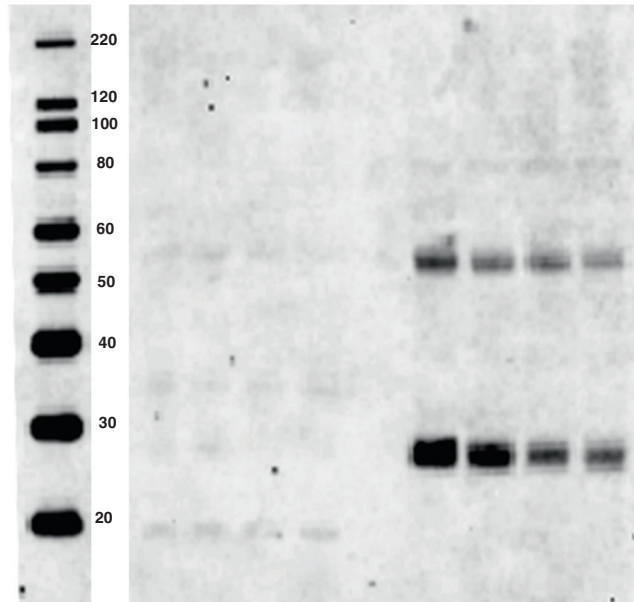

Supplement: MOESM8 [file 9538468]
